# Supplementary material for: A novel method to control carryover contamination in isothermal nucleic acid amplification
Source: Royal Society of Chemistry journal article supplement (doi:10.1039/c7cc06469a), 2017-01-01
Supplement: c7cc06469a1.pdf [file c7cc06469a1.pdf]

## Supporting Information

### **A novel method to control carryover contamination in isothermal nucleic acid amplification**

Cuiping Ma,<sup>a,c</sup> Fuxin Wang,<sup>a</sup> Xiudan Wang,<sup>a</sup> Lingzhi Han,<sup>c</sup> Hao Jing,<sup>a</sup> Heng Zhang,<sup>d</sup> Chao Shi<sup>\*,b</sup>

<sup>a</sup>College of Marine Science and Biological Engineering, Qingdao University of Science and Technology, Qingdao, 266042, PR China.

<sup>b</sup>College of Life Sciences, Qingdao University, Qingdao, 266071, PR China.

<sup>c</sup>Key Laboratory of Sensor Analysis of Tumor Marker, Ministry of Education, College of Chemistry and Molecular Engineering, Qingdao University of Science and Technology, Qingdao, 266042, PR China.

<sup>d</sup>Technical Centre for Food Inspection and Quarantine, Shenzhen Entry-Exit Inspection and Quarantine Bureau, Shenzhen, 518000, PR China.

**\*Corresponding author.**

Dr. Cao Shi; Tel. (Fax.): (+86) 532-8595-9671. E-mail: [sc169@163.com](mailto:sc169@163.com)

## Materials and methods:

### Materials

All primers (**Supplementary Table S1**) were designed by NUPACK software (<http://www.nupack.org/>), synthesized by Sangon Biotech (Shanghai, China), and purified by HPLC. The *Bst* 2.0 WarmStart™ DNA polymerase and ThermoPol buffer were purchased from New England Biolabs (Beijing, China). The *Gsu* I DNA restriction enzyme was purchased from Thermo Scientific (Waltham, Massachusetts, USA). 20×Eva Green was purchased from Bridgen (Beijing, China). dNTPs were purchased from TIANGEN BIOTECH (Beijing, China) and dUTP (100 mM) was purchased from Sangon Biotech (Shanghai, China). 2000 bp DNA Marker and the chemicals used to prepare electrophoresis were purchased from Dalian Takara Company (China).

The model DNA “contaminants” were produced by normal LAMP reaction using PE-primers. The model DNA “contaminants” were serial 10-fold diluted from  $10^1$  to  $10^{12}$ -fold.

### METHODS

The normal LAMP reaction was performed in a total 10  $\mu$ L mixture containing 0.2  $\mu$ M each F3 and B3, 1.6  $\mu$ M each FIP and BIP, 1.6 mM dNTPs, 0.25×Eva Green, 1.6 U *Bst* 2.0 WarmStart™ DNA polymerase, and 1×ThermoPol buffer (20 mM Tris-HCl, 10 mM KCl, 10 mM (NH<sub>4</sub>)<sub>2</sub>SO<sub>4</sub>, 2 mM MgSO<sub>4</sub>, 0.1% Triton X-100, pH 8.8). The LAMP reaction was initiated by 1  $\mu$ L targets and incubated at 65°C. The

LAMP reaction was performed in a CFX96 Real-Time PCR detection system (Bio-Rad) at 1-min intervals.

The PE-LAMP reaction was performed in 10  $\mu$ L containing 0.2  $\mu$ M each F3 and B3, 1.8  $\mu$ M each PE-FIP and PE-BIP, 1.6 mM dNTPs, 0.25 $\times$ Eva Green, 1.6 U *Bst* 2.0 WarmStart<sup>TM</sup> DNA polymerase, 0.5 U *Gsu* I DNA restriction enzymes and 1 $\times$ FastDigest buffer. The reaction was firstly incubated at 37 $^{\circ}$ C for 10 min, followed by heating at 70 $^{\circ}$ C for 10 min, and isothermal cycles were performed at 65 $^{\circ}$ C for 60 min.

## Supplementary Figures

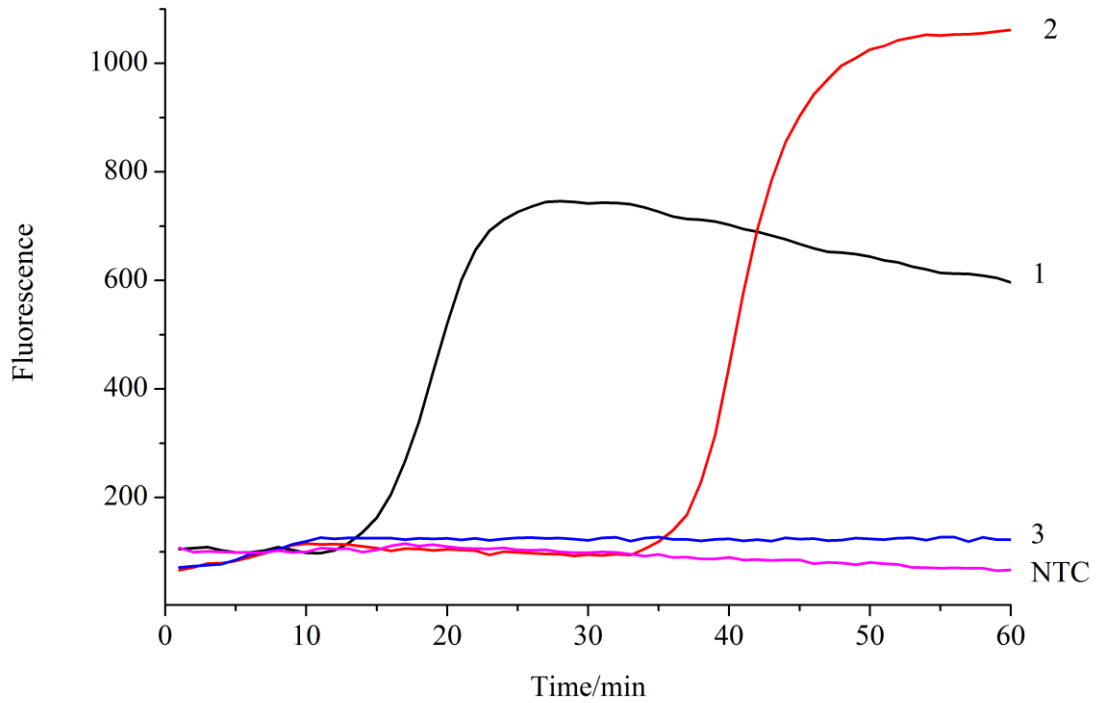

**Figure S1. The detection limit of the model “contaminants”.**

1-3 respectively represented that  $10^4$ ,  $10^8$ ,  $10^{12}$ -fold diluted model DNA “contaminants” were used as the targets for normal LMAP reaction. The 10  $\mu\text{L}$  reaction system contained  $2.0 \times 10^{-7}$  M F3 and B3,  $1.6 \times 10^{-6}$  M PE-FIP and PE-BIP, 1.6 mM dNTPs, 0.25 $\times$ Eva Green, 1.6 U *Bst* 2.0 WarmStart<sup>TM</sup> DNA polymerase and 1 $\times$ FastDigest Buffer. NTC was no target control.

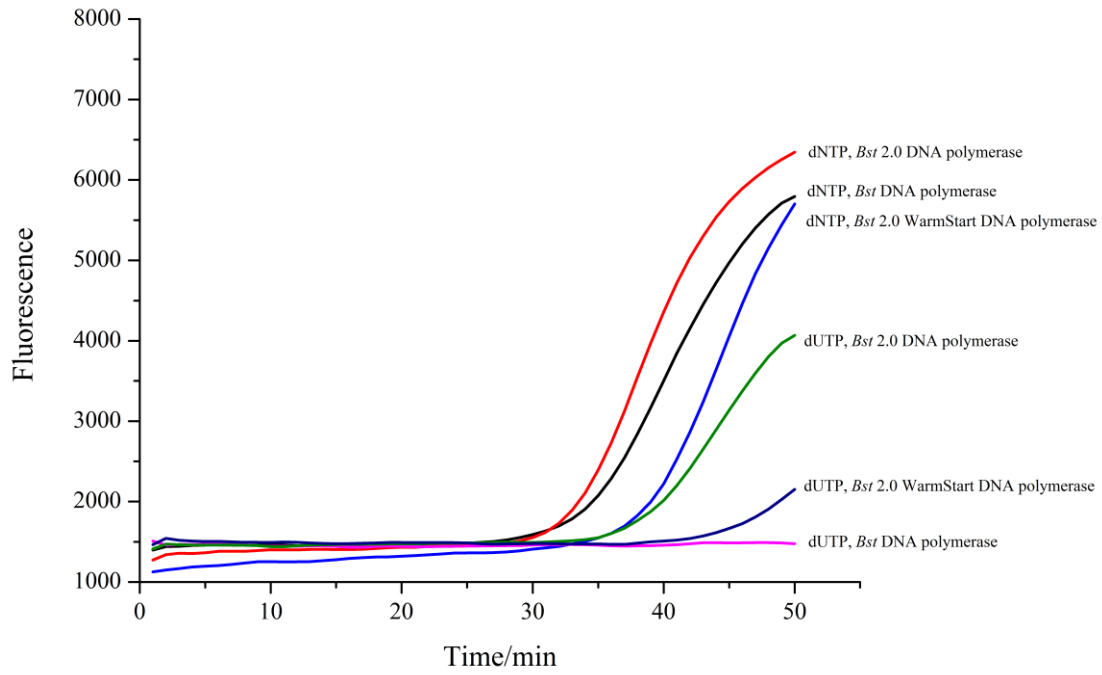

**Figure S2.** The LAMP reactions were catalyzed by three DNA polymerases with and without 1.6 mM dUTPs.

The reaction mixture contained 0.2  $\mu\text{M}$  each F3 and B3, 1.6  $\mu\text{M}$  each FIP and BIP, 1.6 mM dNTPs, 0.25 $\times$ Eva Green, 1.6 U *Bst*, *Bst* 2.0 or *Bst* 2.0 WarmStart<sup>TM</sup> DNA polymerase, and 1 $\times$ ThermoPol buffer. The LAMP reaction was initiated by 1  $\mu\text{L}$  culture fluid of *V. Parahemolyticus* diluted 100-fold at 65 $^{\circ}\text{C}$  for 60 min.

## Supplementary Table

**Supplementary Table S1.** Sequences of nucleic acids used in this work.

| Name                                                                               | Sequence (from 5' to 3')                                                                                                                                                                                                                                                                             |
|------------------------------------------------------------------------------------|------------------------------------------------------------------------------------------------------------------------------------------------------------------------------------------------------------------------------------------------------------------------------------------------------|
| V.<br><i>Parahemolyticus</i><br>( <sup>a</sup> M36437.1<br><sup>b</sup> 1093-1300) | <u>GCGCAAGGTTACAACATCACGTTGTT</u> <b>TGATACTCACGCCTTGTTCGA</b> GACGCTAA<br>CTTCTGCGCCCGAAGAGCACGGTTTCGTGAACGCGAGCGATCCTTGTGGACAT<br>CAACCGCTCATCGTCTGTCGATTACATGTACACCCACGCATTGCGCTCTGAGTGT<br><b>G C A G C G T C T G G T G C T G A G A A G T T T G T G T T C T G G A A T G T C A C G C (208 nt)</b> |
| <b>F3</b>                                                                          | GCGCAAGGTTACAACATCAC                                                                                                                                                                                                                                                                                 |
| <b>B3</b>                                                                          | GCGTGACATTCCAGAACACA                                                                                                                                                                                                                                                                                 |
| <b>Normal FIP</b>                                                                  | CGCGTTCACGAAACCGTGC <b>TGATACTCACGCCTTGTTCGA</b>                                                                                                                                                                                                                                                     |
| <b>Normal BIP</b>                                                                  | TTGGACATCAACCGCTCATCGT <b>GACGCTGCACACTCAGAG</b>                                                                                                                                                                                                                                                     |
| <b>PE-FIP</b>                                                                      | CGCGTTCACGAAACCGTGC <b>CTGGAG</b> <b>TGATACTCACGCCTTGTTCGA</b>                                                                                                                                                                                                                                       |
| <b>PE-BIP</b>                                                                      | TTGGACATCAACCGCTCATCGT <b>CTGGAGGACGCTGCACACTCAGAG</b>                                                                                                                                                                                                                                               |

<sup>a</sup> GenBank accession number    <sup>b</sup> The position of specific sequence in genomic DNA

The dotted sequence of the target was complementary with primer B3. The underlined portion was the same as primer F3. The bold portion of the target and primer BIP were complementary. The boxed portion of the target and primer FIP were the same. The red portions of PE-FIP and PE-BIP were recognition sites for the endonuclease *Gsu* I.
